# Supplementary material for: Transcriptional response to cardiac injury in the zebrafish: systematic identification of genes with highly concordant activity across in vivo models
Source: PubMed Central journal article supplement (PMC4197235; doi:10.1186/1471-2164-15-852), 2014-10-03
Supplement: 12864_2014_6534_MOESM2_ESM.pdf [file 12864_2014_6534_MOESM2_ESM.pdf]

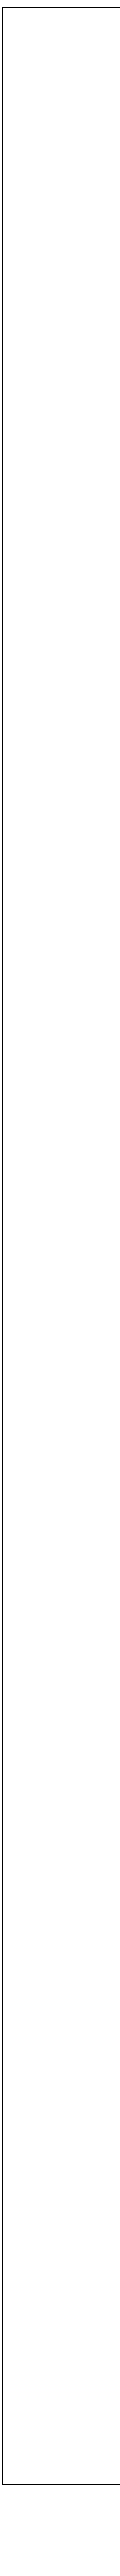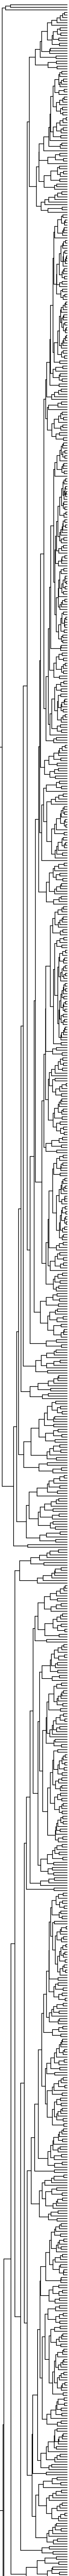

| Label     | Value    |
|-----------|----------|
| GSM450363 | 0.000000 |
| GSM450364 | 0.000000 |
| GSM450365 | 0.000000 |
| GSM450367 | 0.000000 |
| GSM450368 | 0.000000 |
| GSM450366 | 0.000000 |
| GSM450369 | 0.000000 |
| GSM450370 | 0.000000 |
| GSM450371 | 0.000000 |
| GSM450374 | 0.000000 |
| GSM450373 | 0.000000 |
| GSM450372 | 0.000000 |
| GSM450376 | 0.000000 |
| GSM450377 | 0.000000 |
| GSM450375 | 0.000000 |
